# Supplementary material
Source: ML conference proceedings conference paper supplement (https://openreview.net/forum?id=zgs0L72R4c)

# bungeenerf\_barcelona Opacity Distribution Comparison

## Opacity Probability Density Function

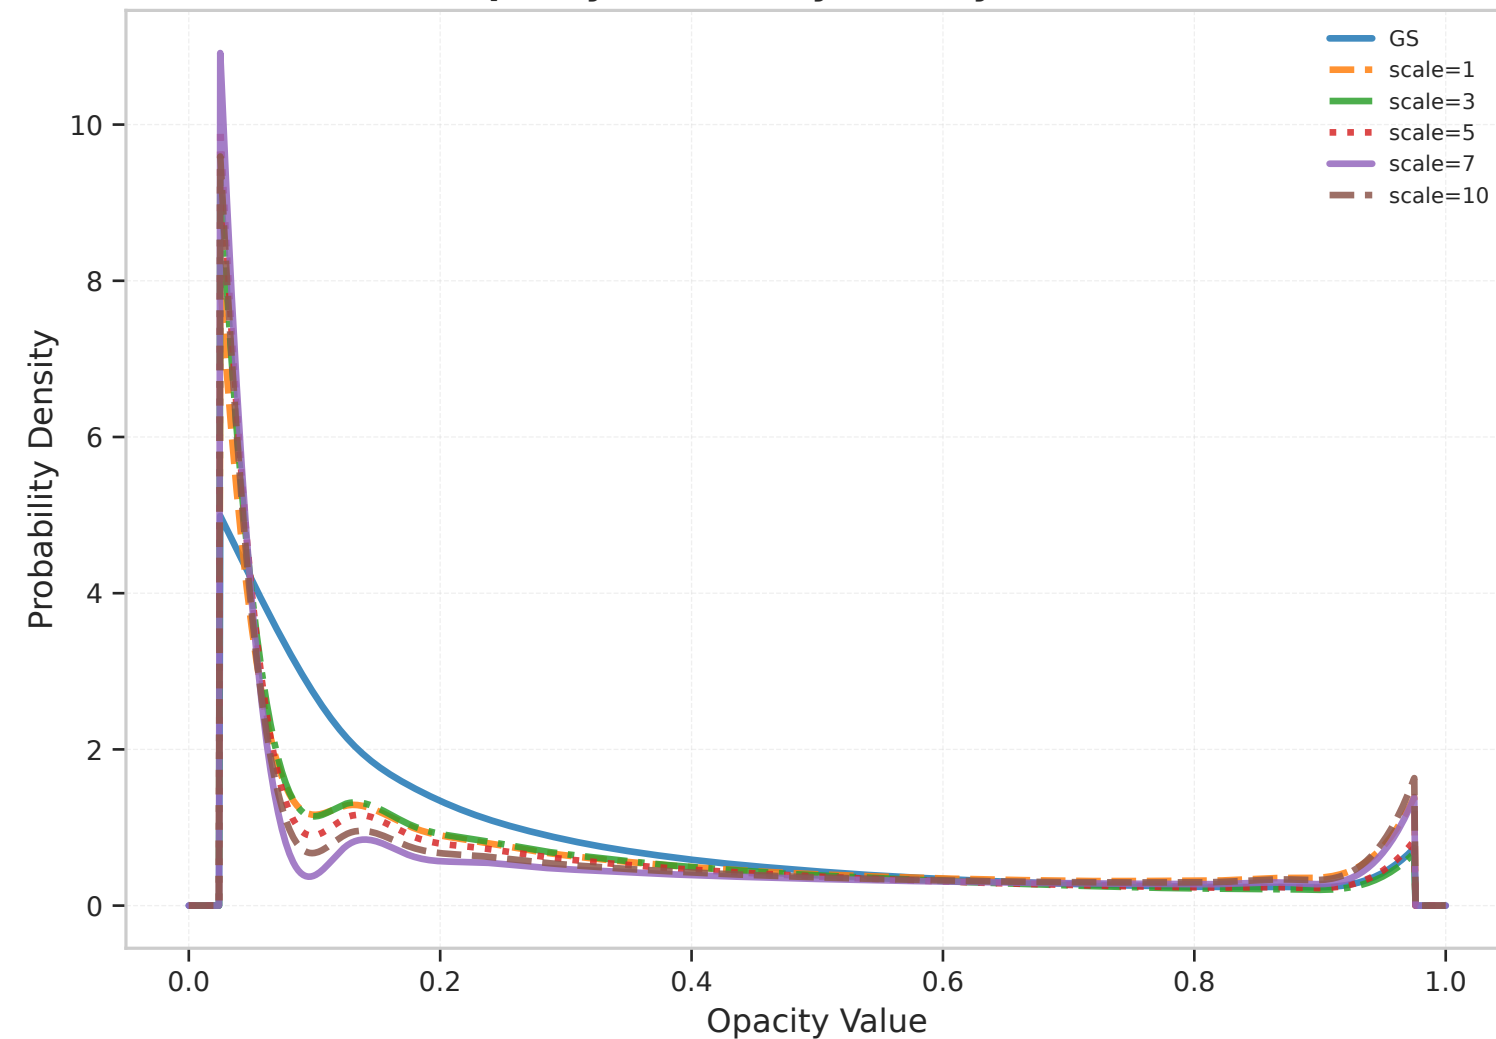

## Opacity Cumulative Distribution Function

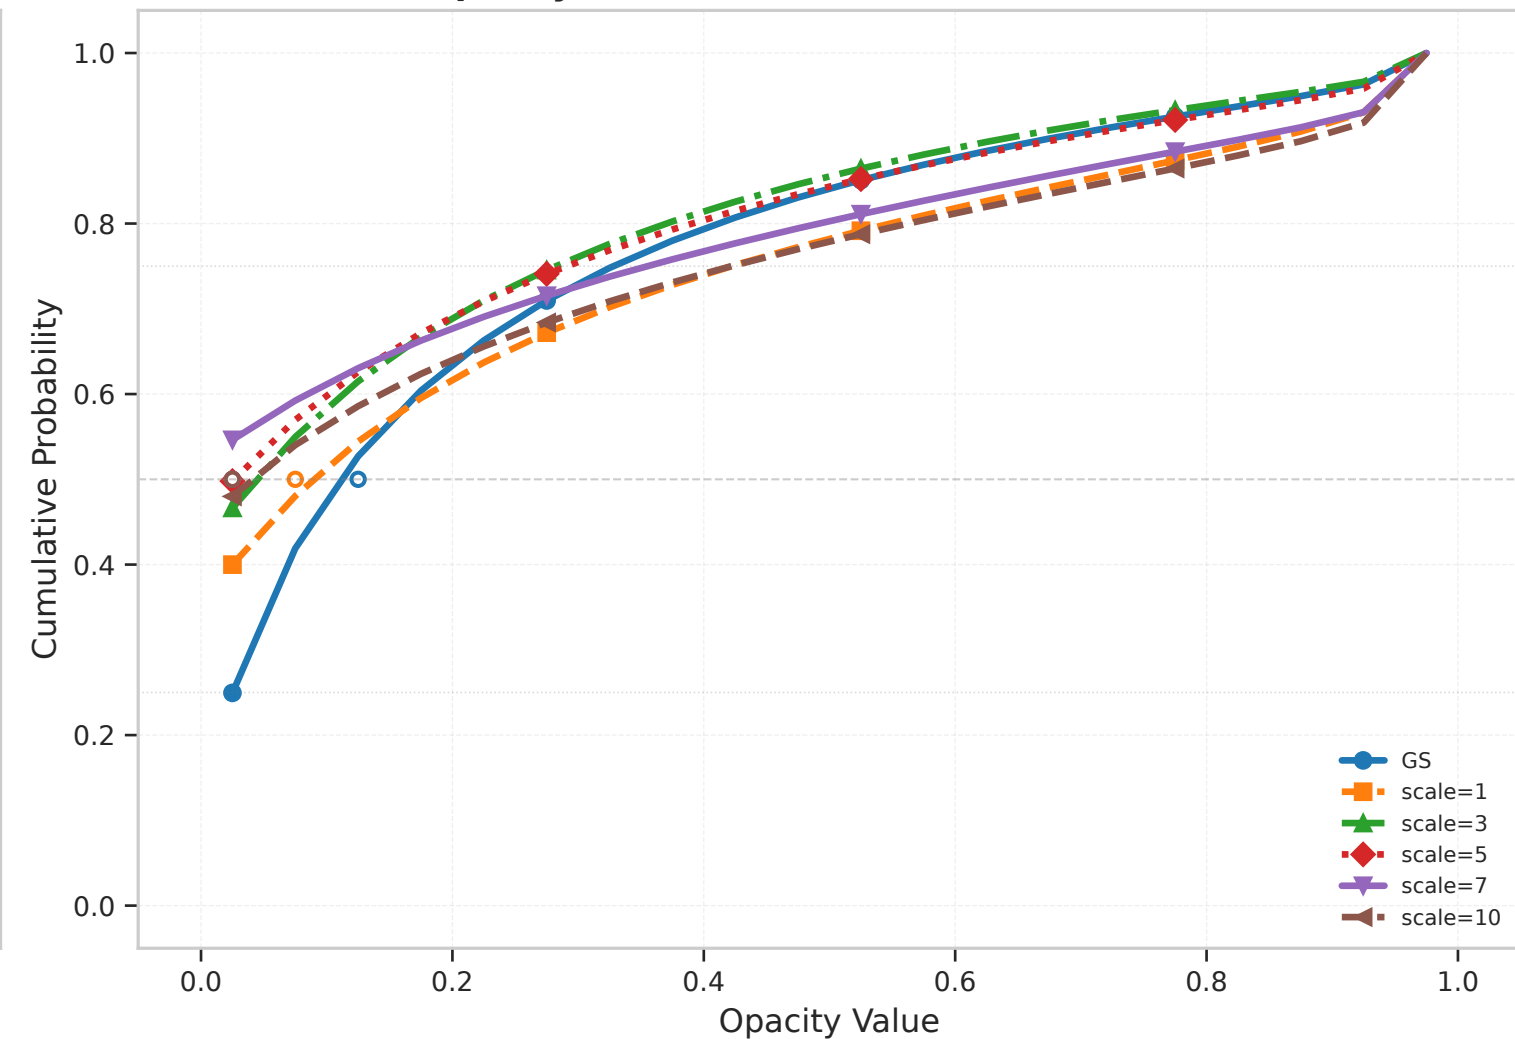

## Decay Factor Probability Density Function

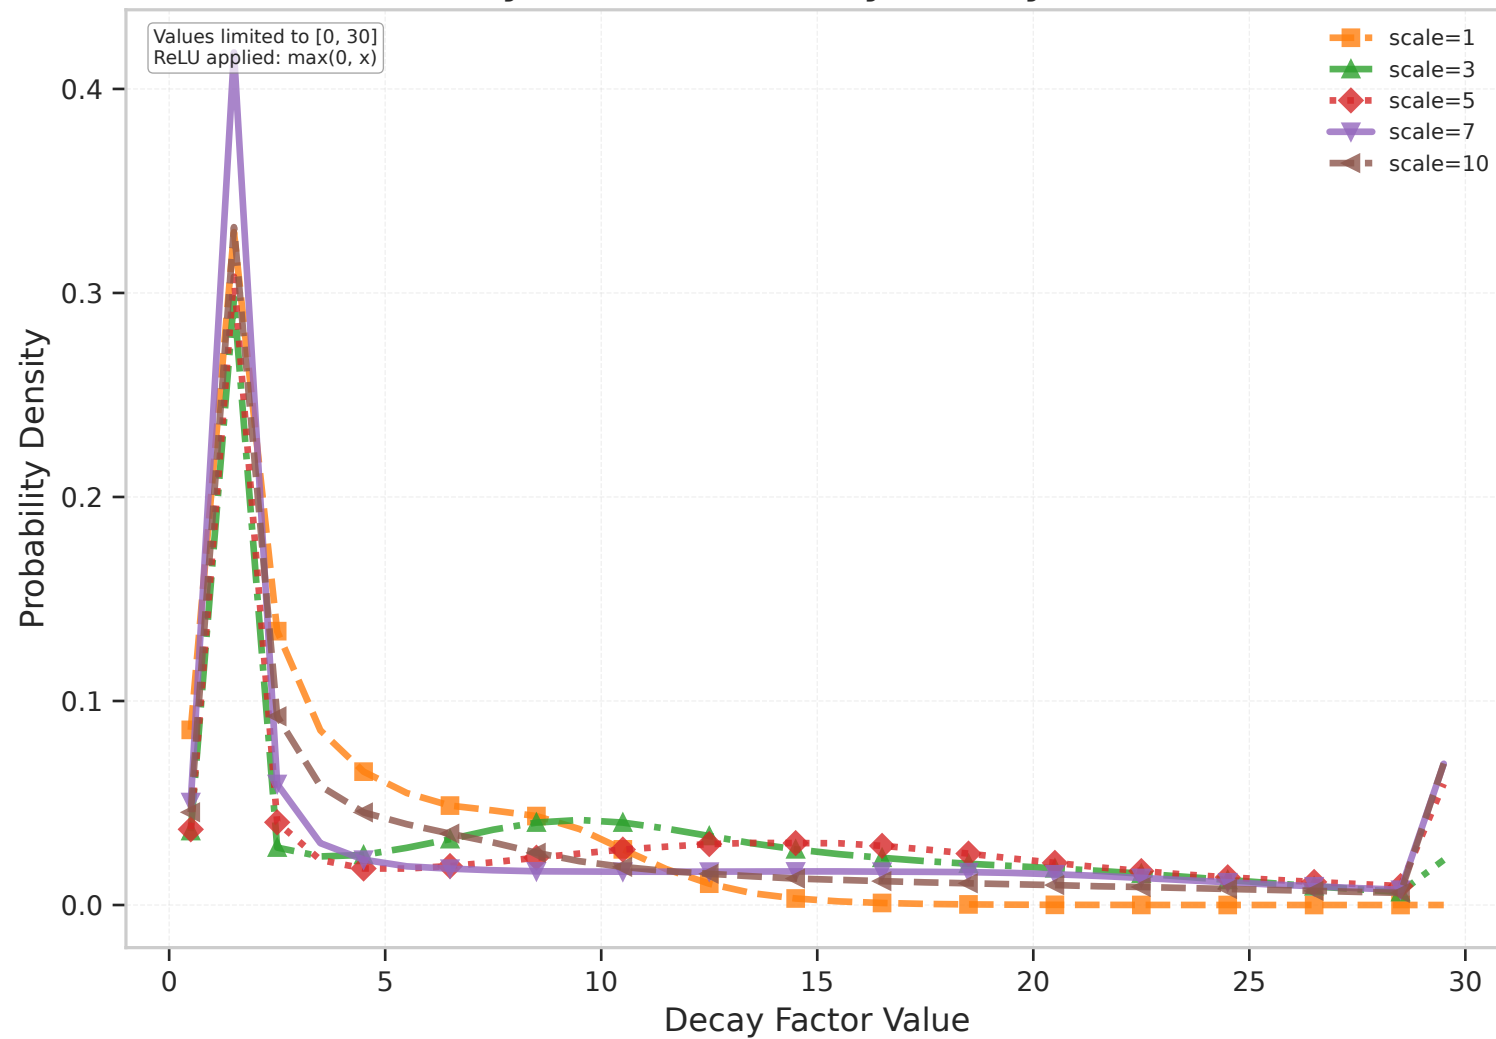

## Decay Factor Cumulative Distribution Function

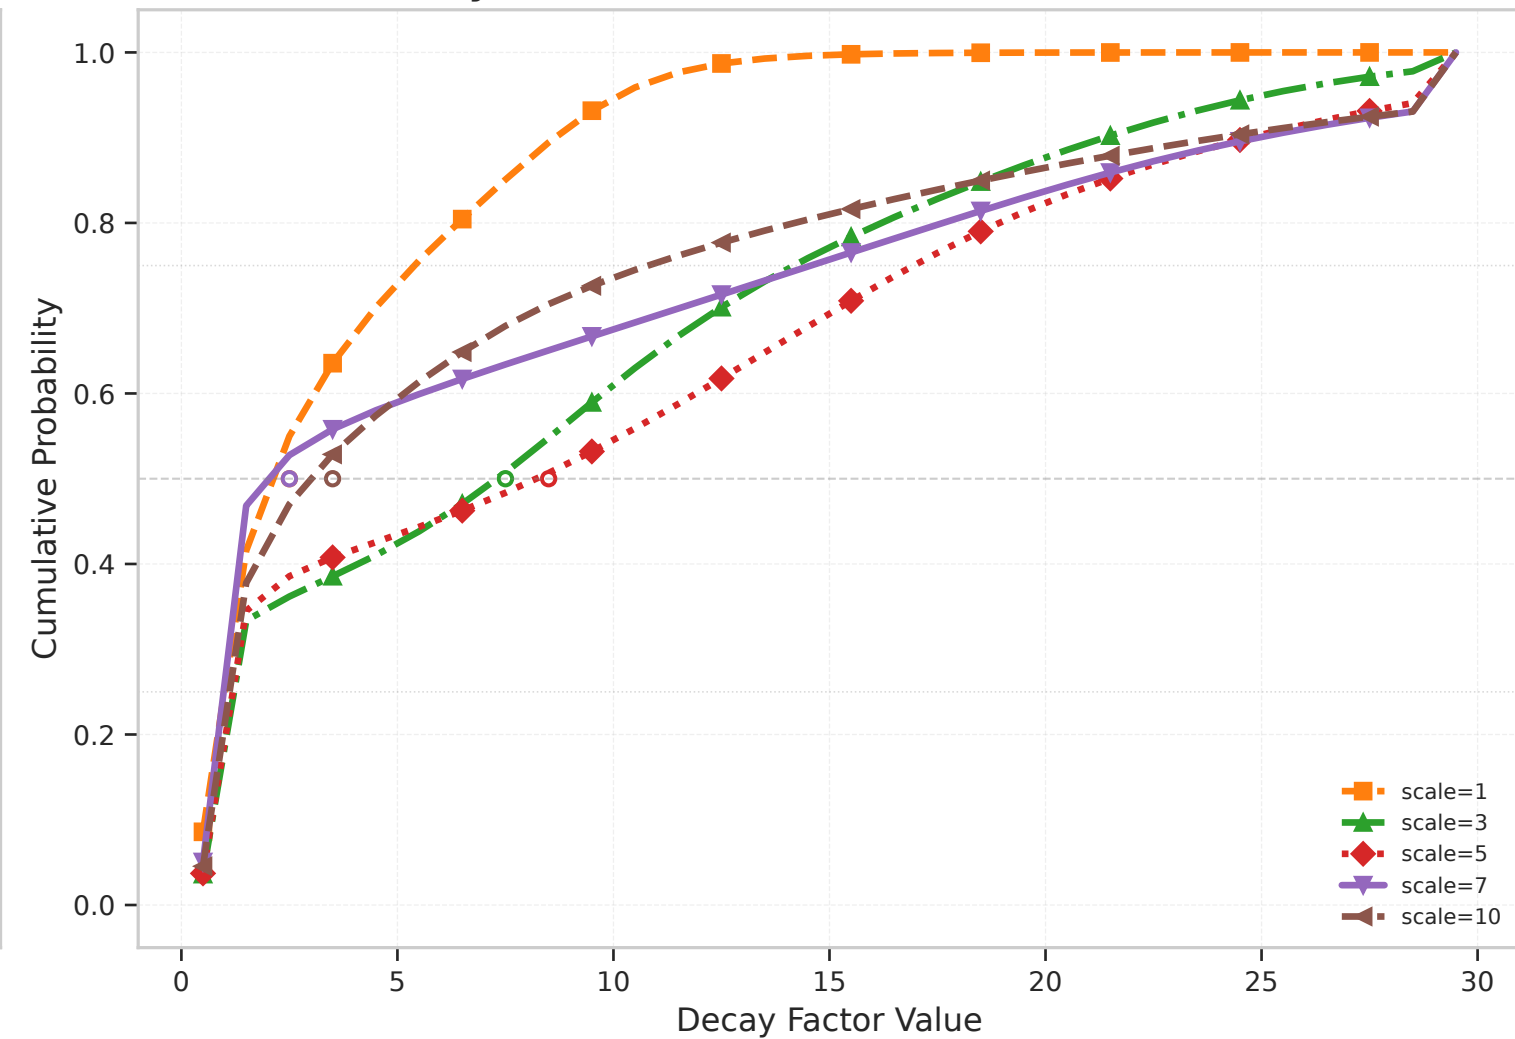

Supplement: supplementary_material [file bungeenerf_barcelona_opacity_and_decay_curves.pdf › visualization material/opa_decay_fig/bungeenerf_barcelona/bungeenerf_barcelona_opacity_and_decay_curves.pdf]
