# Supplementary material
Source: ML conference proceedings conference paper supplement (https://openreview.net/forum?id=zgs0L72R4c)

# tant\_db\_playroom Opacity Distribution Comparison

## Opacity Probability Density Function

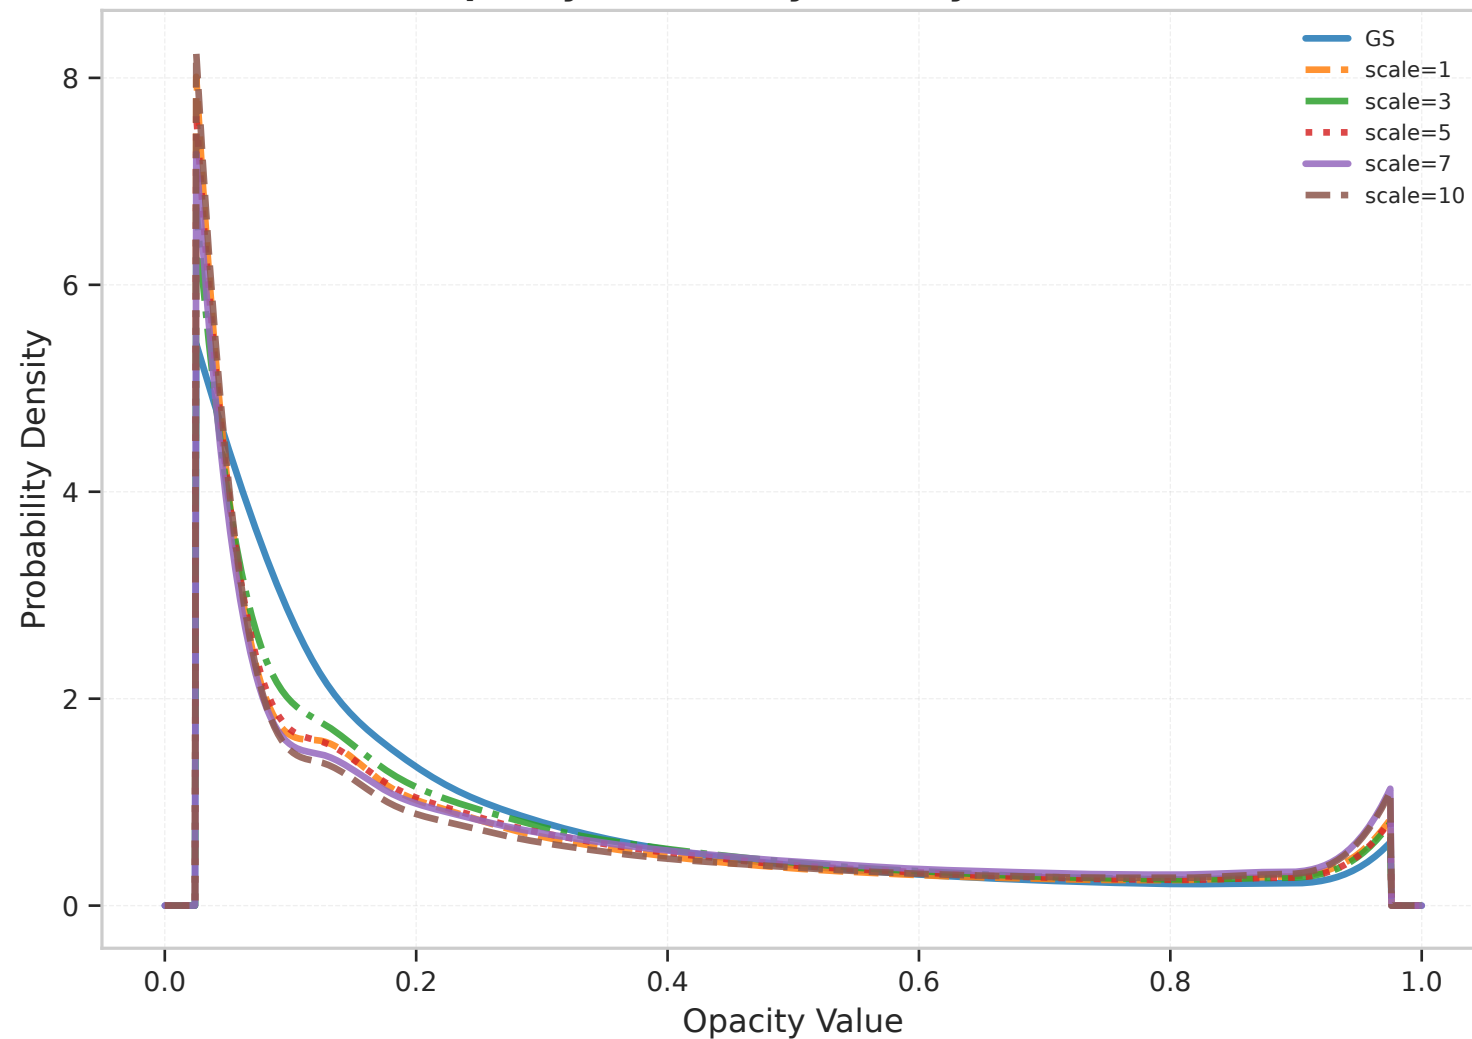

## Opacity Cumulative Distribution Function

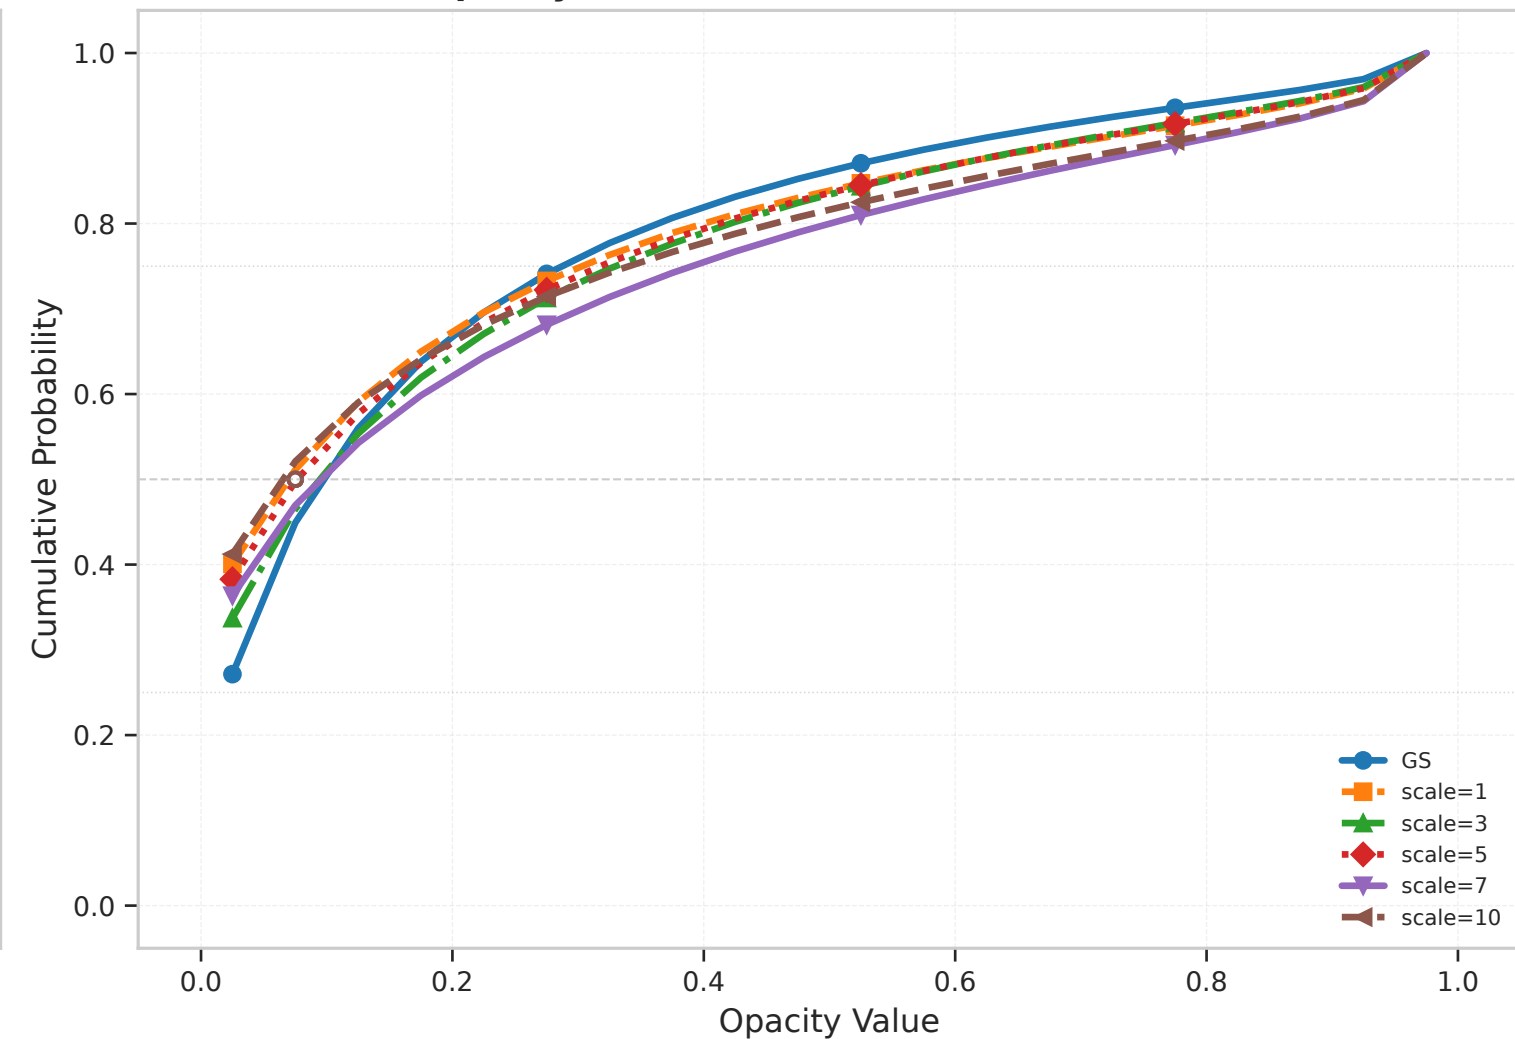

## Decay Factor Probability Density Function

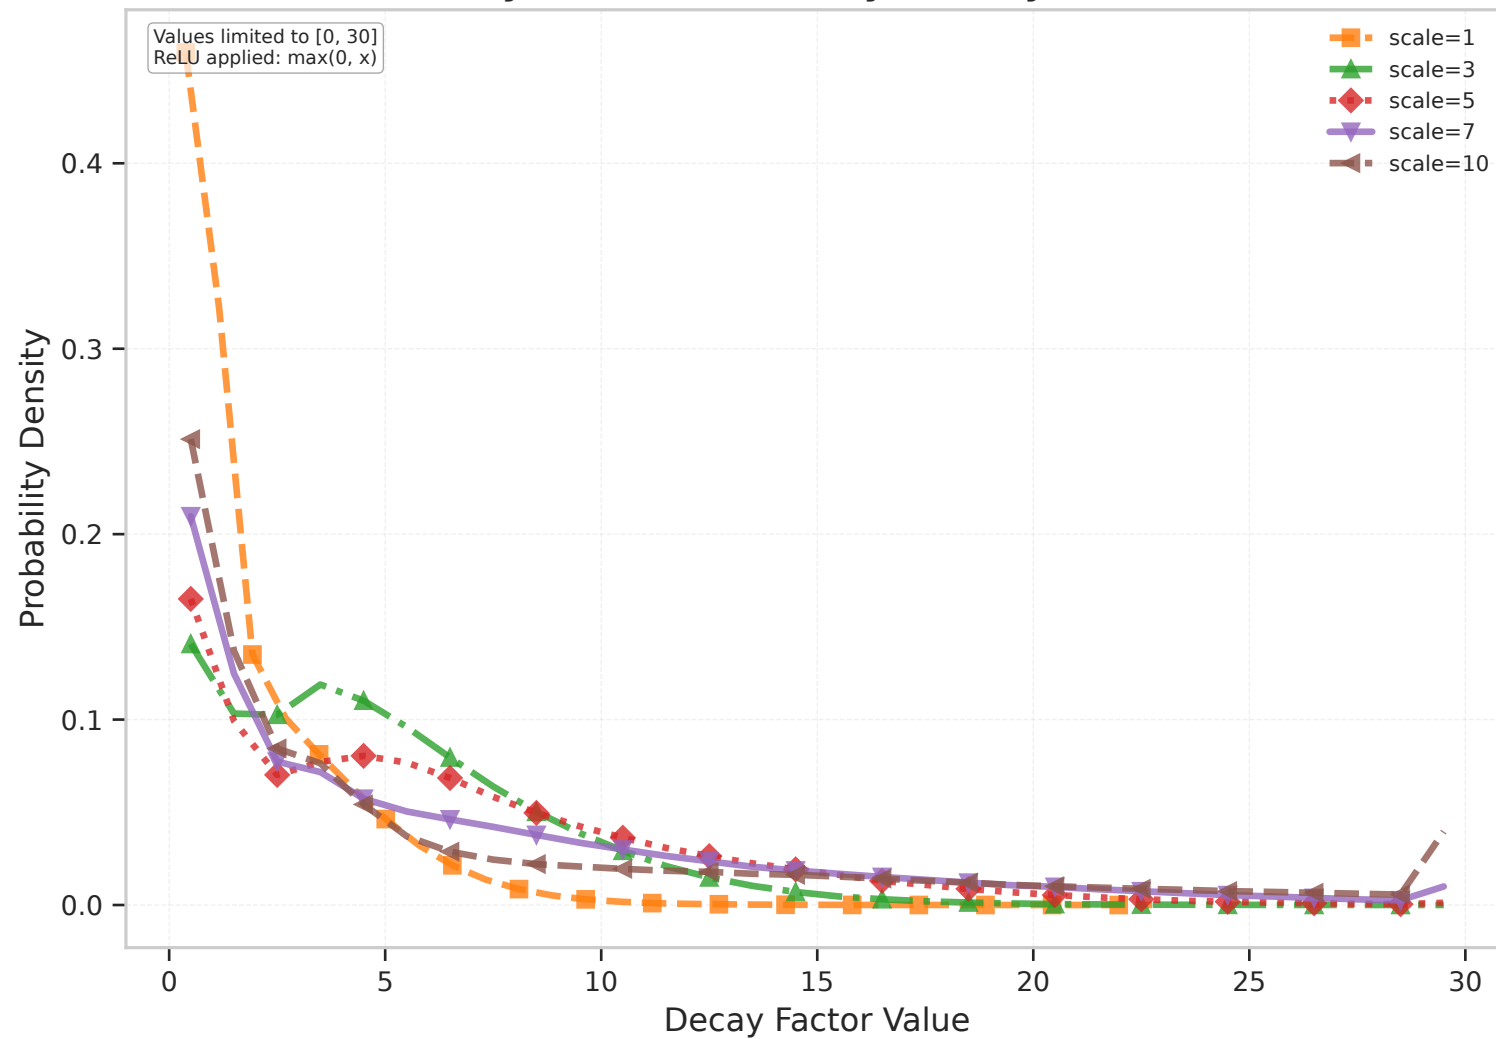

## Decay Factor Cumulative Distribution Function

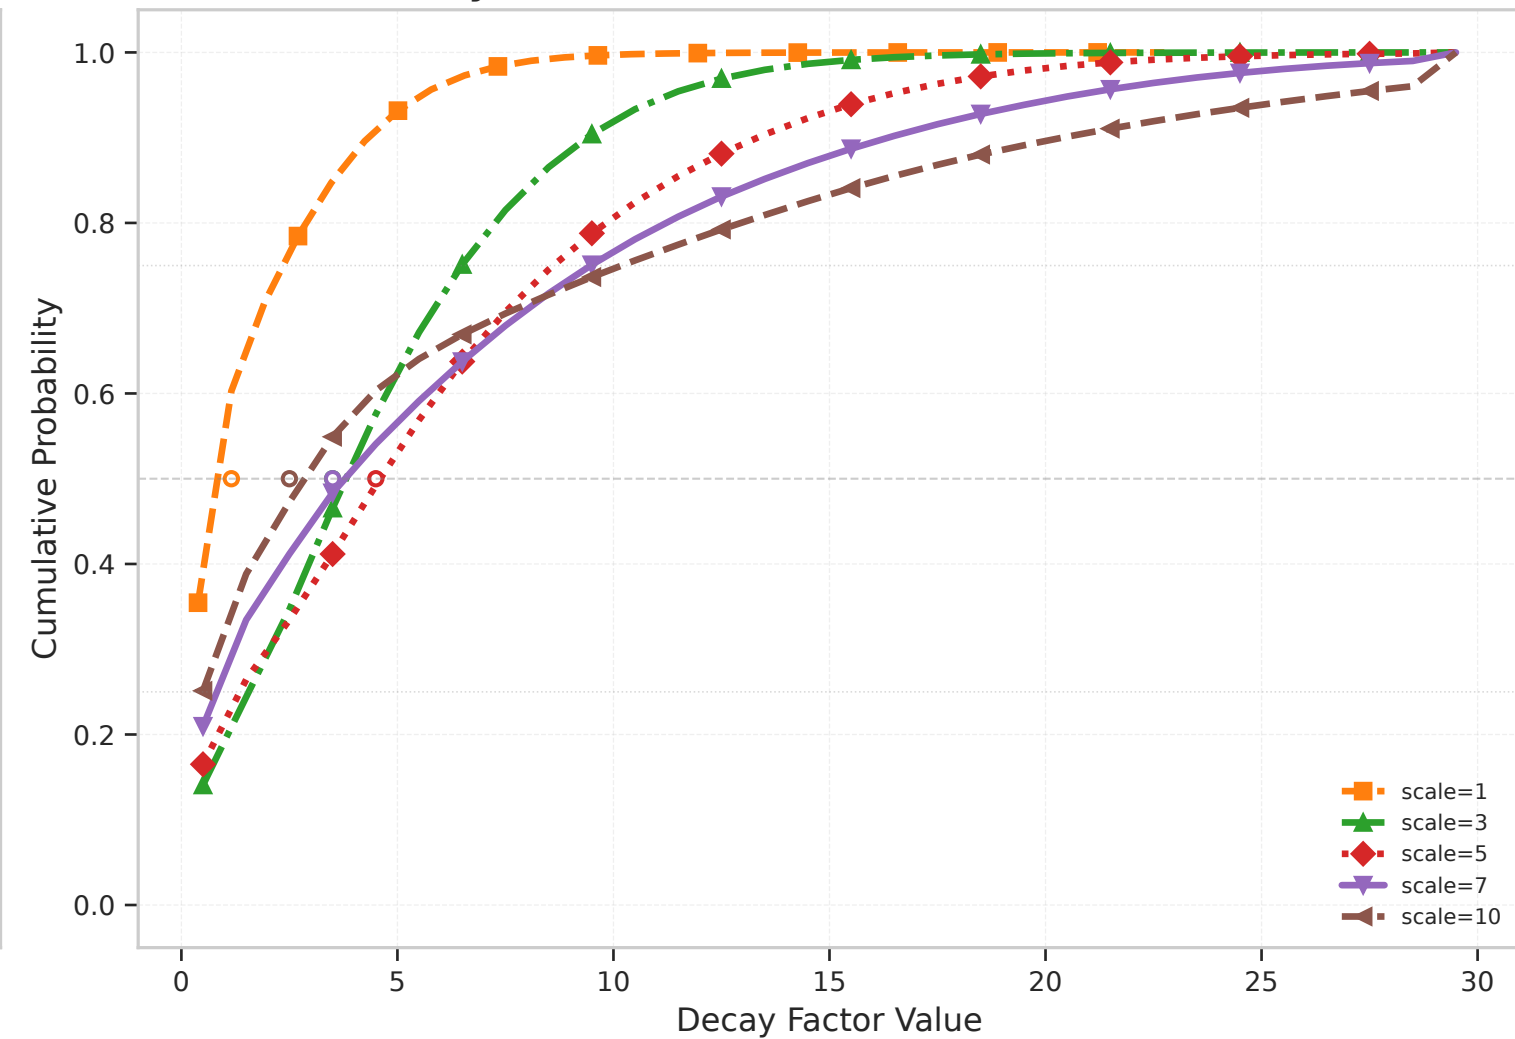

Supplement: supplementary_material [file tant_db_playroom_opacity_and_decay_curves.pdf › visualization material/opa_decay_fig/tant_db_playroom/tant_db_playroom_opacity_and_decay_curves.pdf]
