# Supplementary material
Source: ML conference proceedings conference paper supplement (https://openreview.net/forum?id=zgs0L72R4c)

**PSNR vs FPS - 360v2**

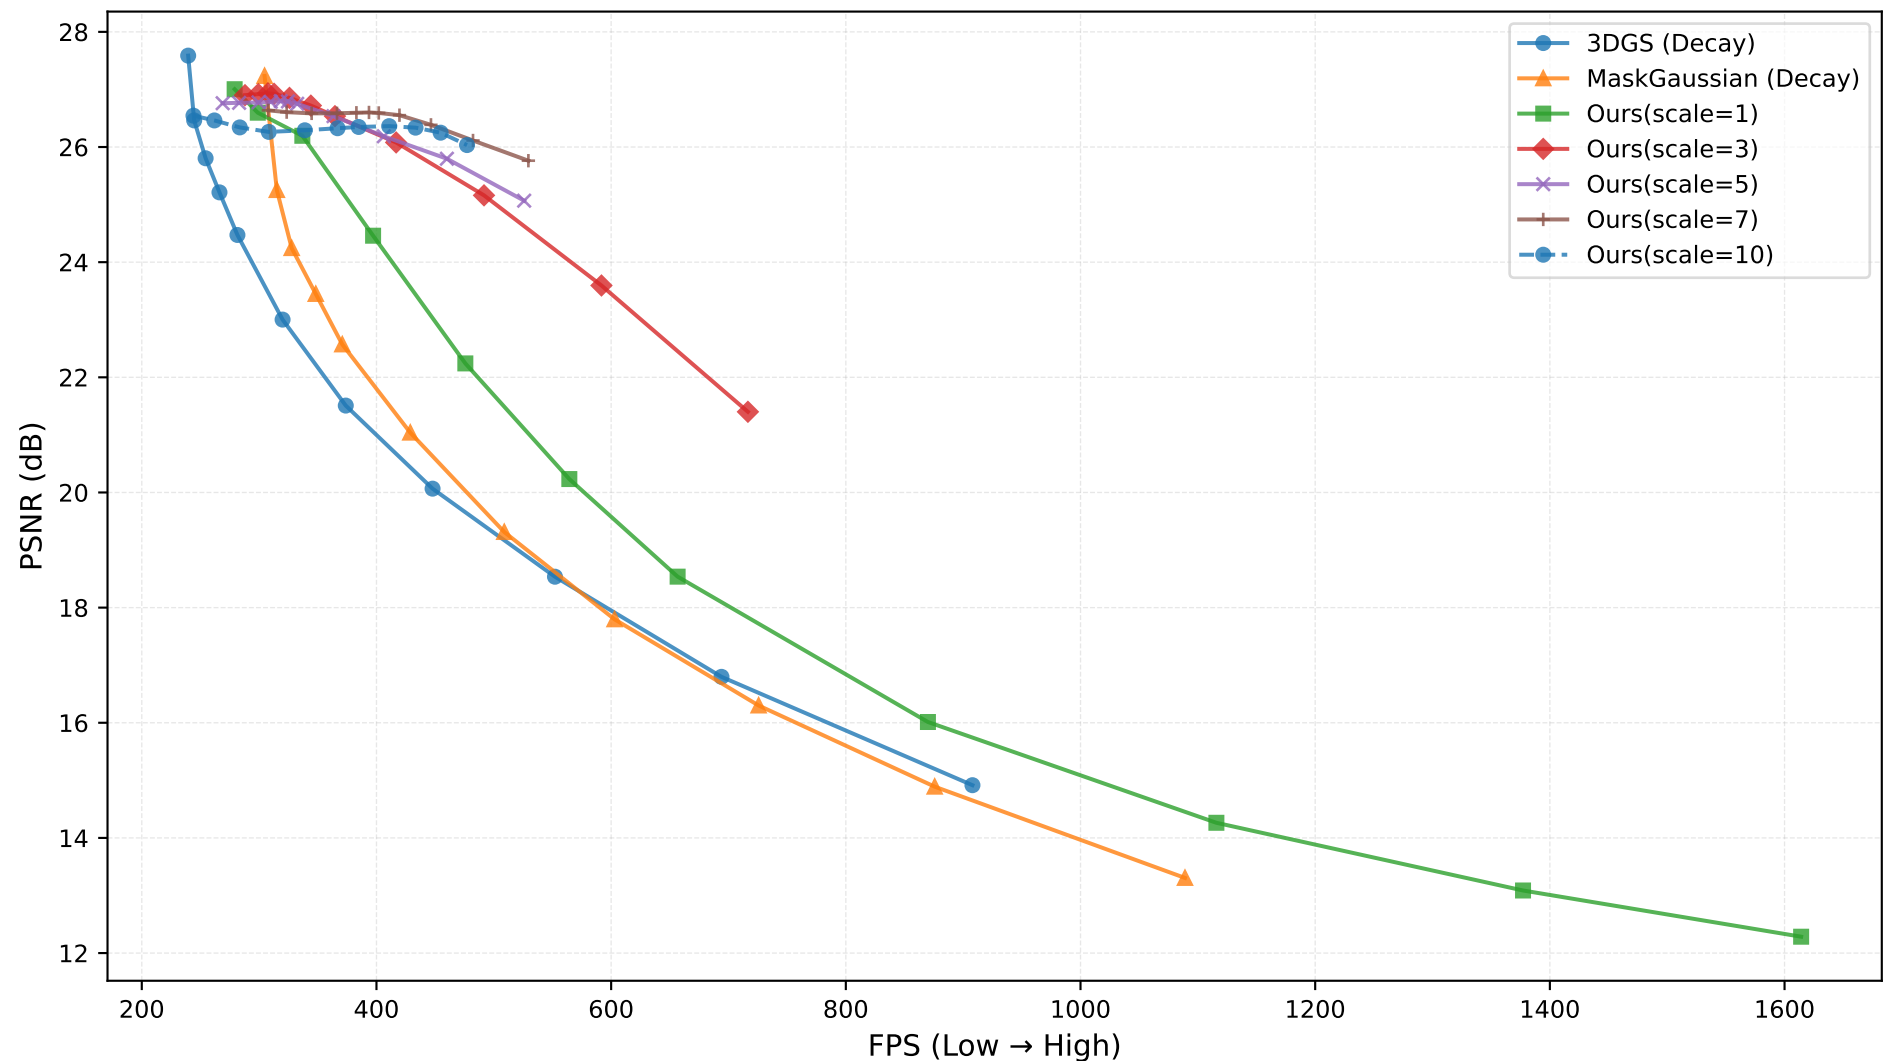

Supplement: supplementary_material [file 360v2_psnr_vs_fps.pdf › visualization material/new_curves/360v2_psnr_vs_fps.pdf]

FPS vs Points Count (Averaged) - Deep Blending

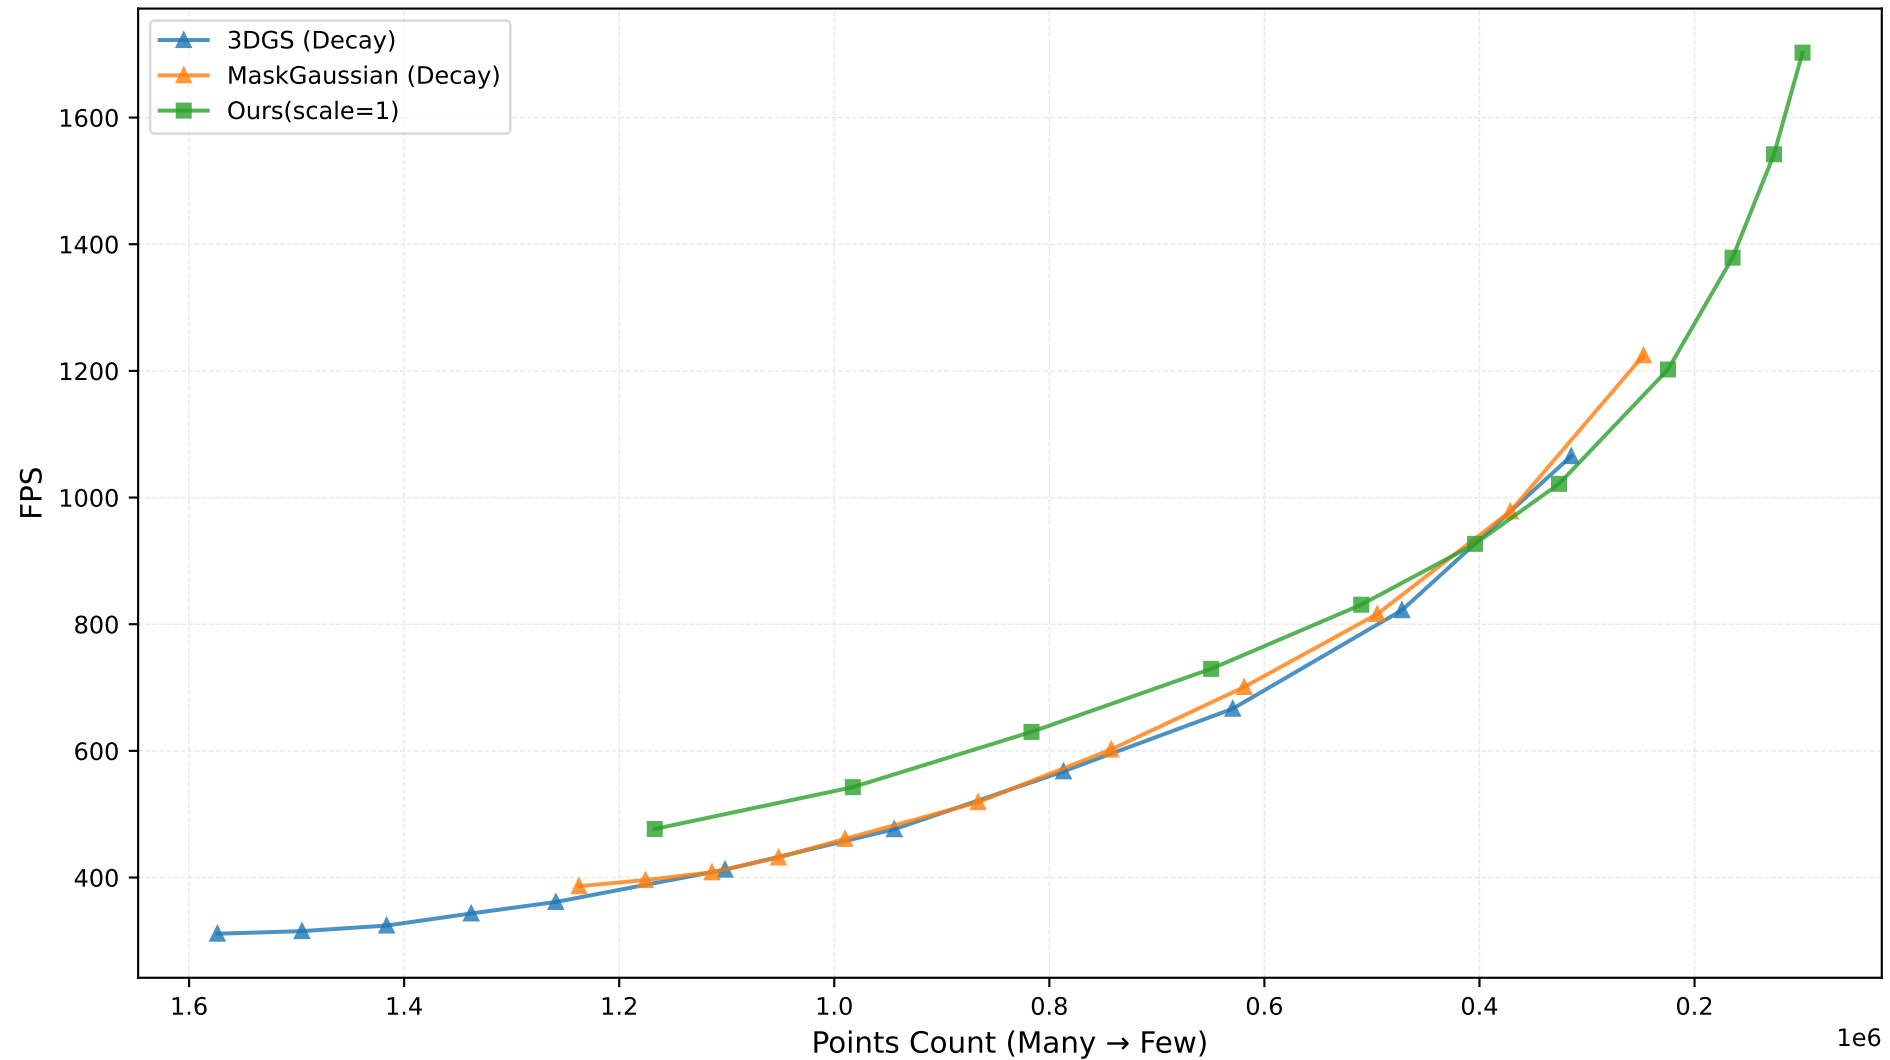

Supplement: supplementary_material [file Deep Blending_fps_rendering_averaged.pdf › visualization material/new_curves/Deep Blending_fps_rendering_averaged.pdf]

**PSNR & FPS vs Points Count - Deep Blending**

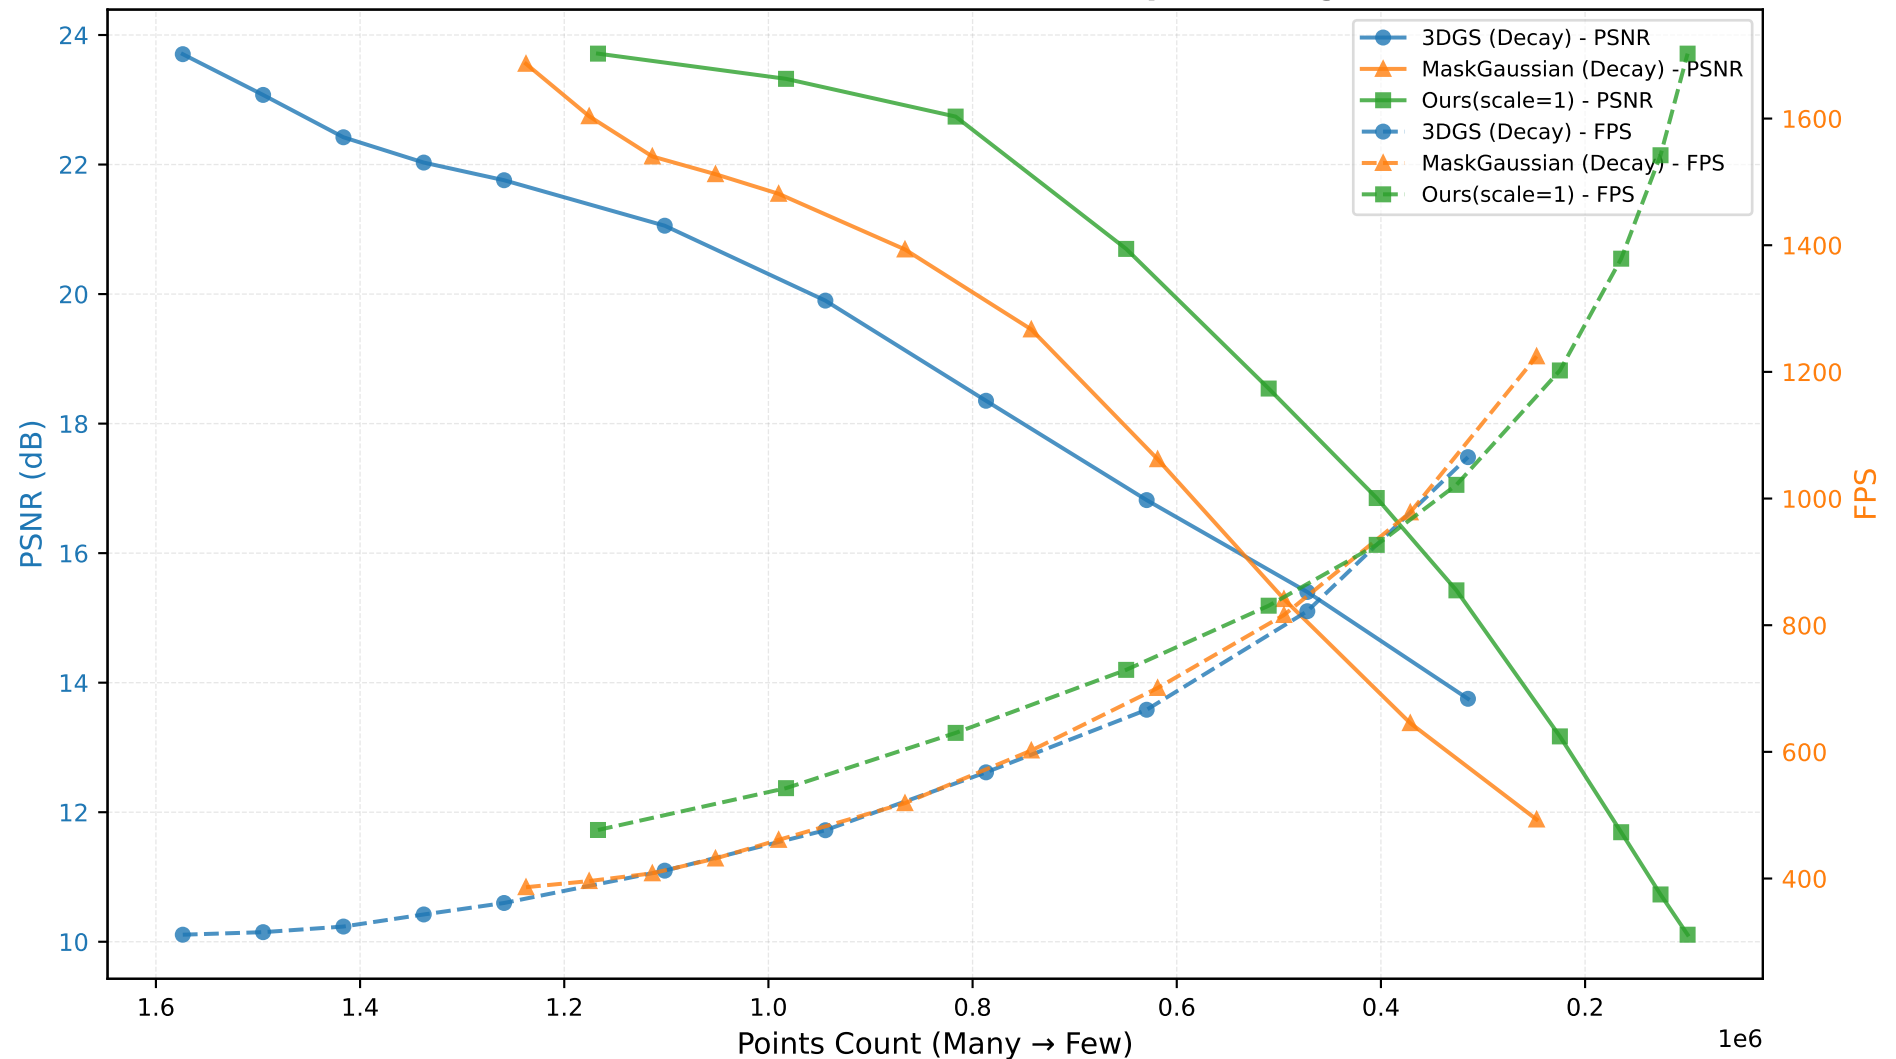

Supplement: supplementary_material [file Deep Blending_psnr_fps_dual_axis.pdf › visualization material/new_curves/Deep Blending_psnr_fps_dual_axis.pdf]

PSNR vs FPS - Deep Blending

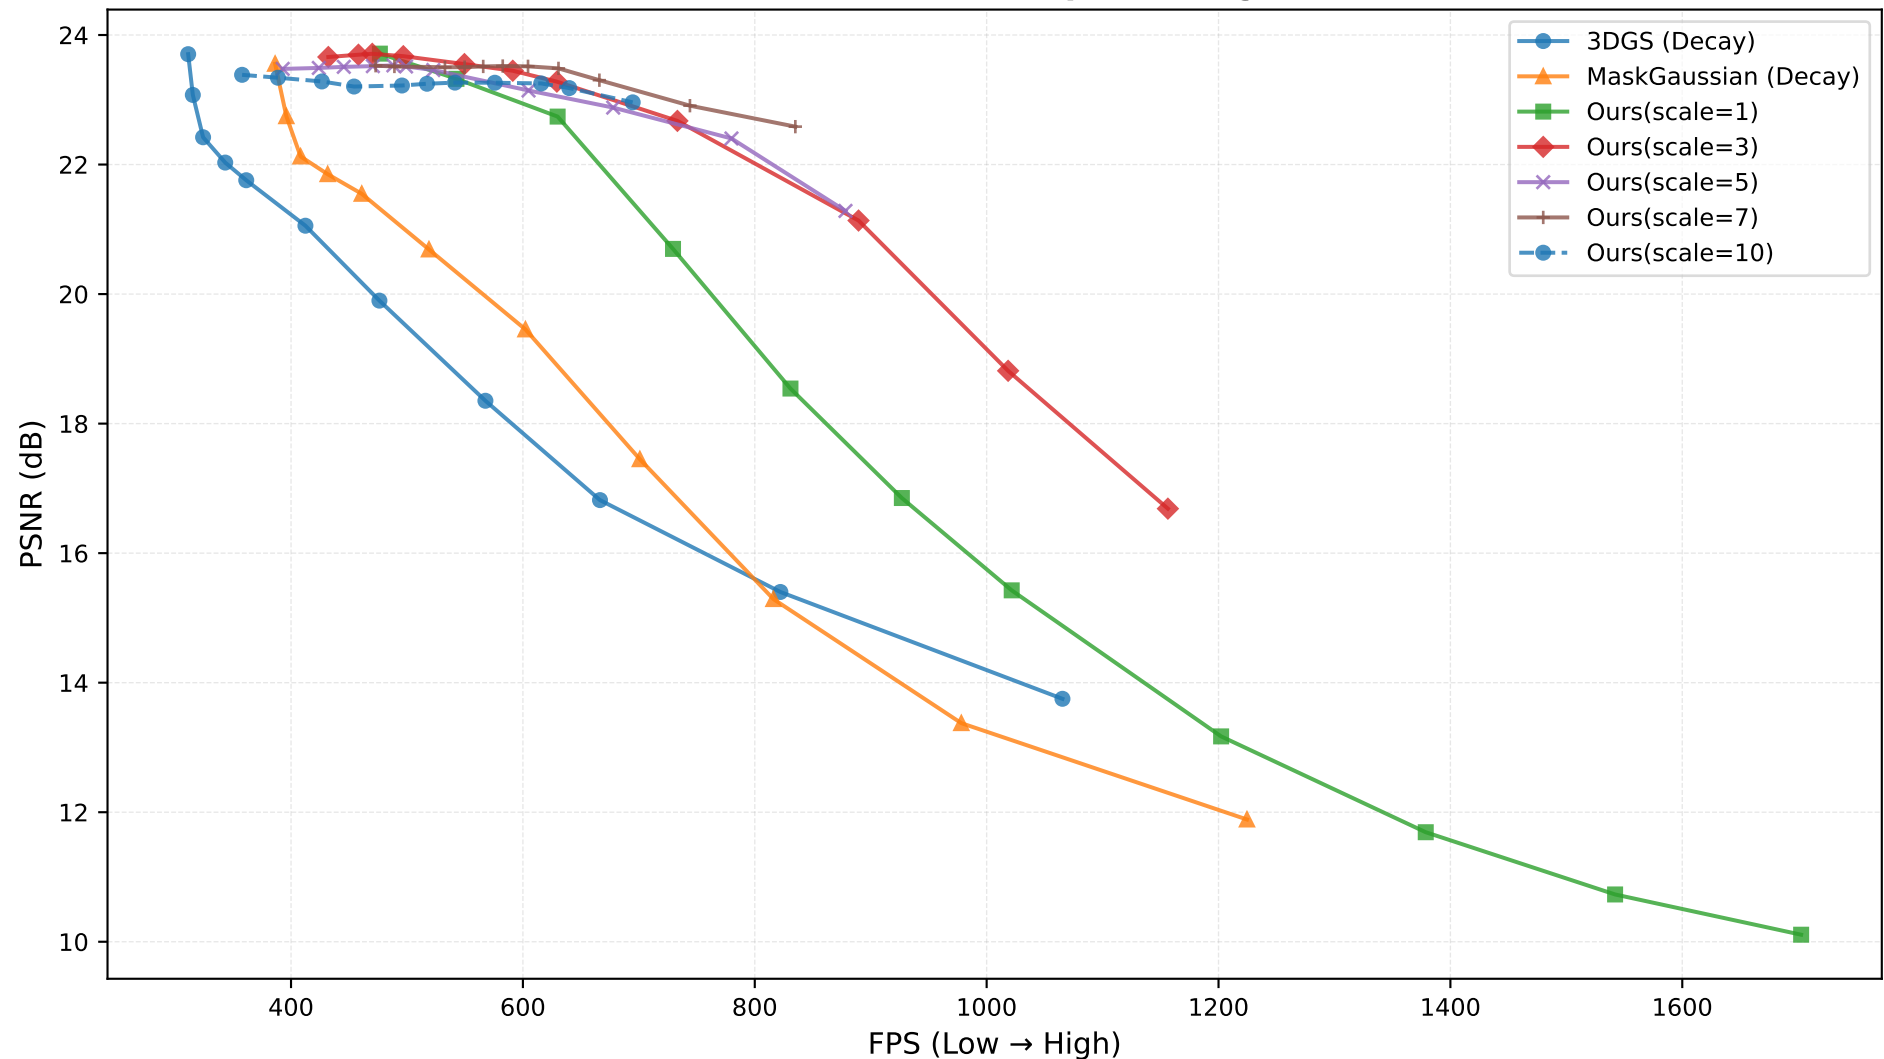

Supplement: supplementary_material [file Deep Blending_psnr_vs_fps.pdf › visualization material/new_curves/Deep Blending_psnr_vs_fps.pdf]

FPS vs Points Count (Averaged) - Tanks&amp;Temples

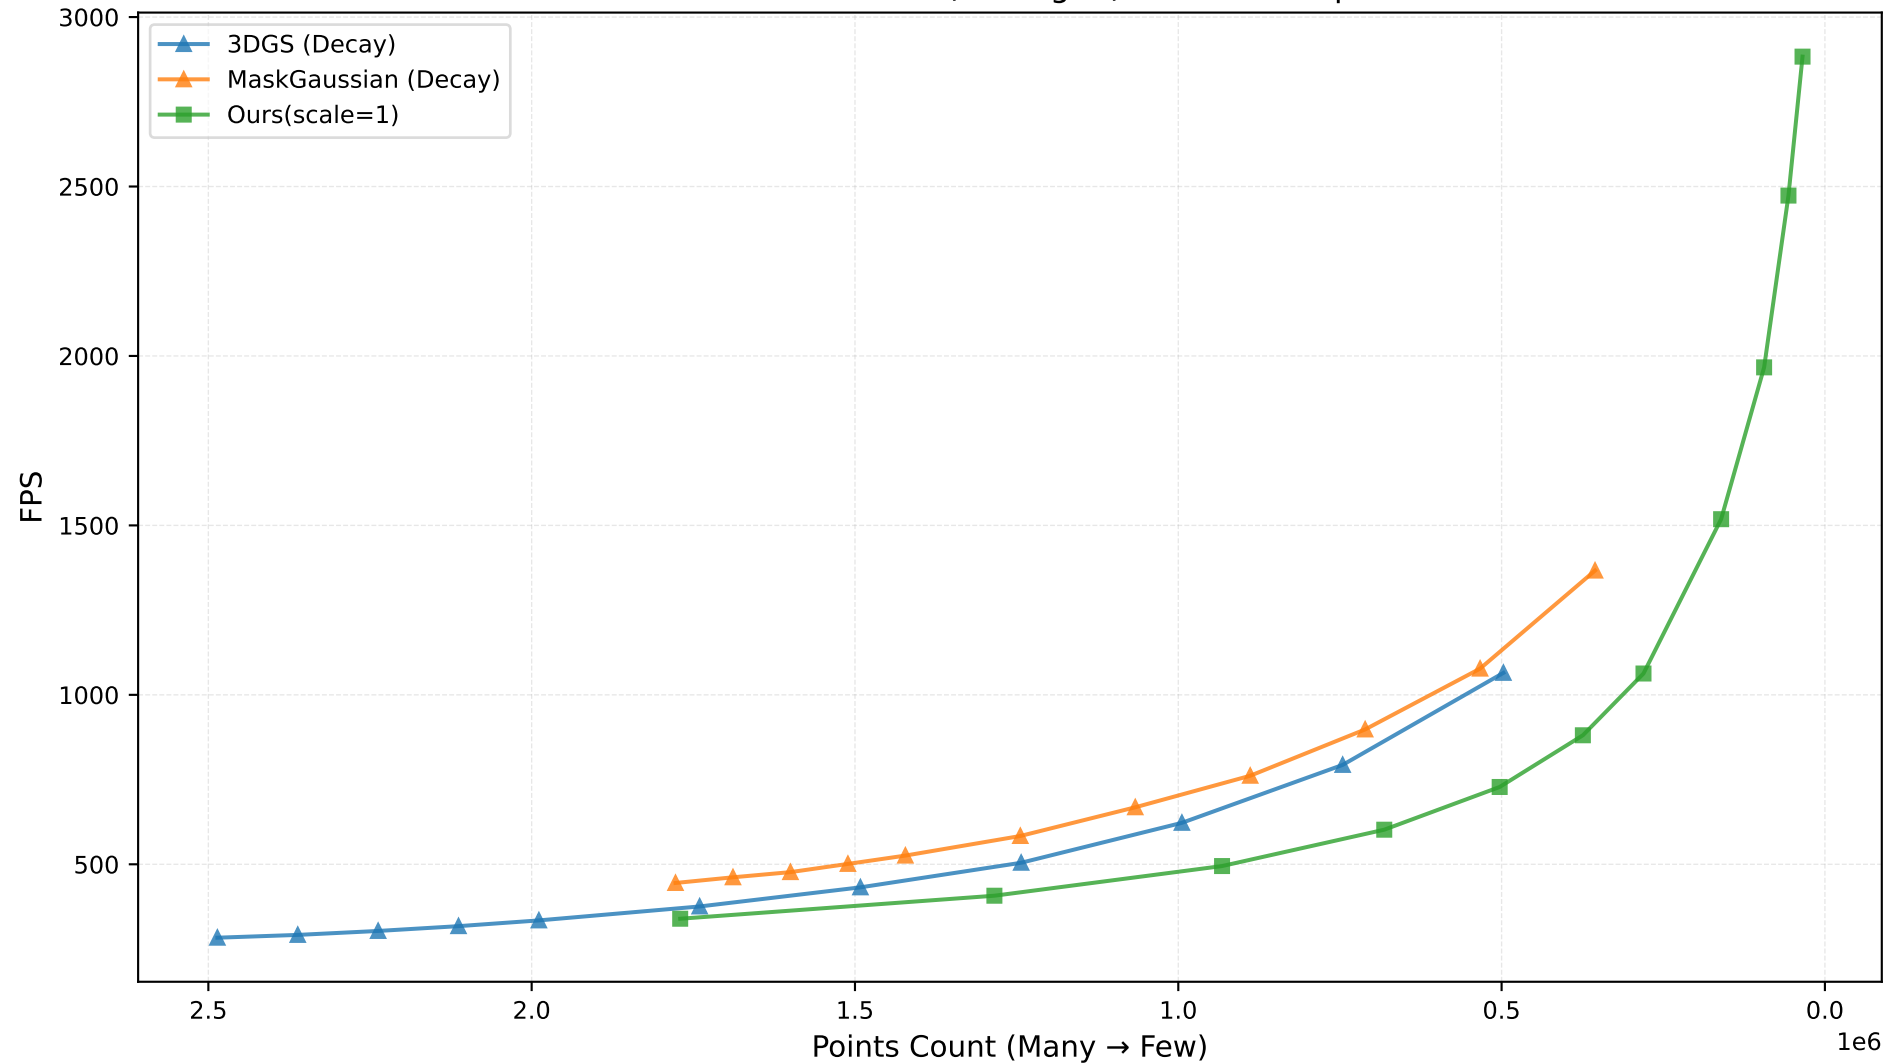

Supplement: supplementary_material [file Tanks&Temples_fps_rendering_averaged.pdf › visualization material/new_curves/Tanks&Temples_fps_rendering_averaged.pdf]

PSNR & FPS vs Points Count - Tanks&Temples

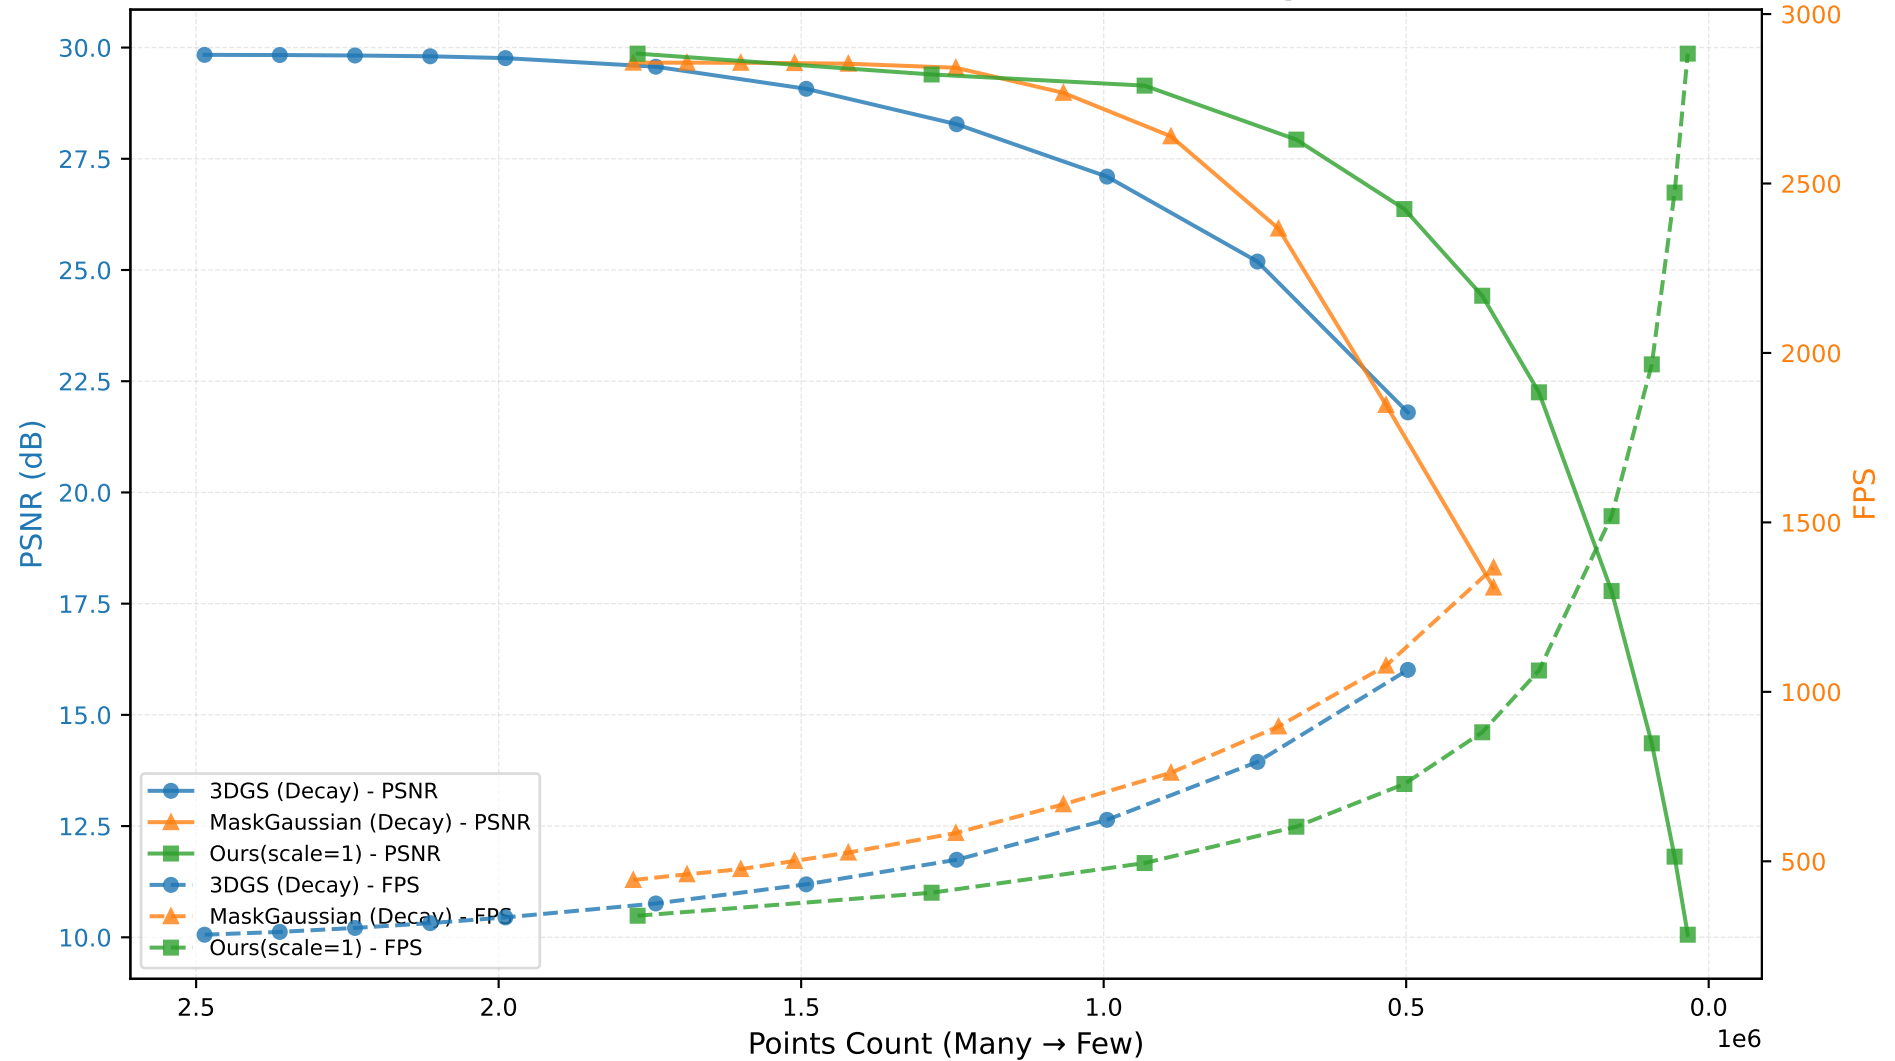

Supplement: supplementary_material [file Tanks&Temples_psnr_fps_dual_axis.pdf › visualization material/new_curves/Tanks&Temples_psnr_fps_dual_axis.pdf]

**PSNR vs FPS - Tanks&Temples**

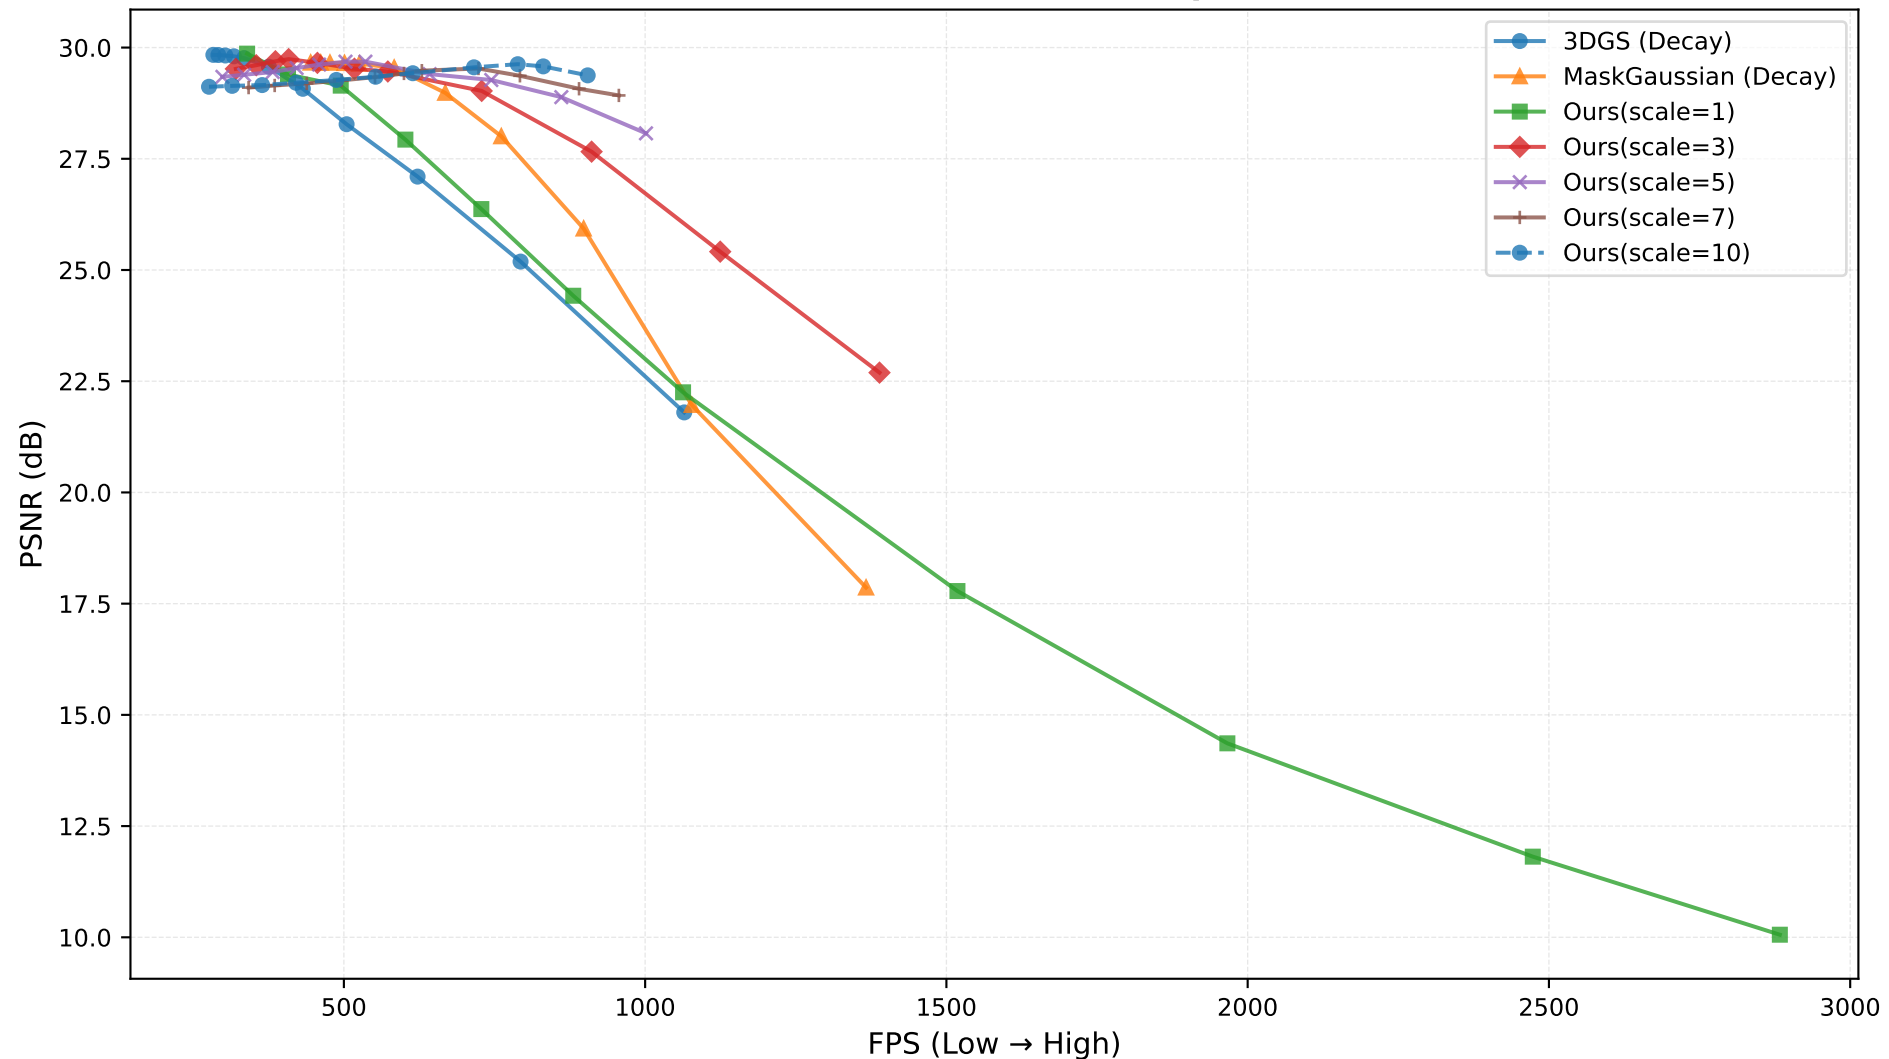

Supplement: supplementary_material [file Tanks&Temples_psnr_vs_fps.pdf › visualization material/new_curves/Tanks&Temples_psnr_vs_fps.pdf]

FPS vs Points Count (Averaged) - bungeenerf

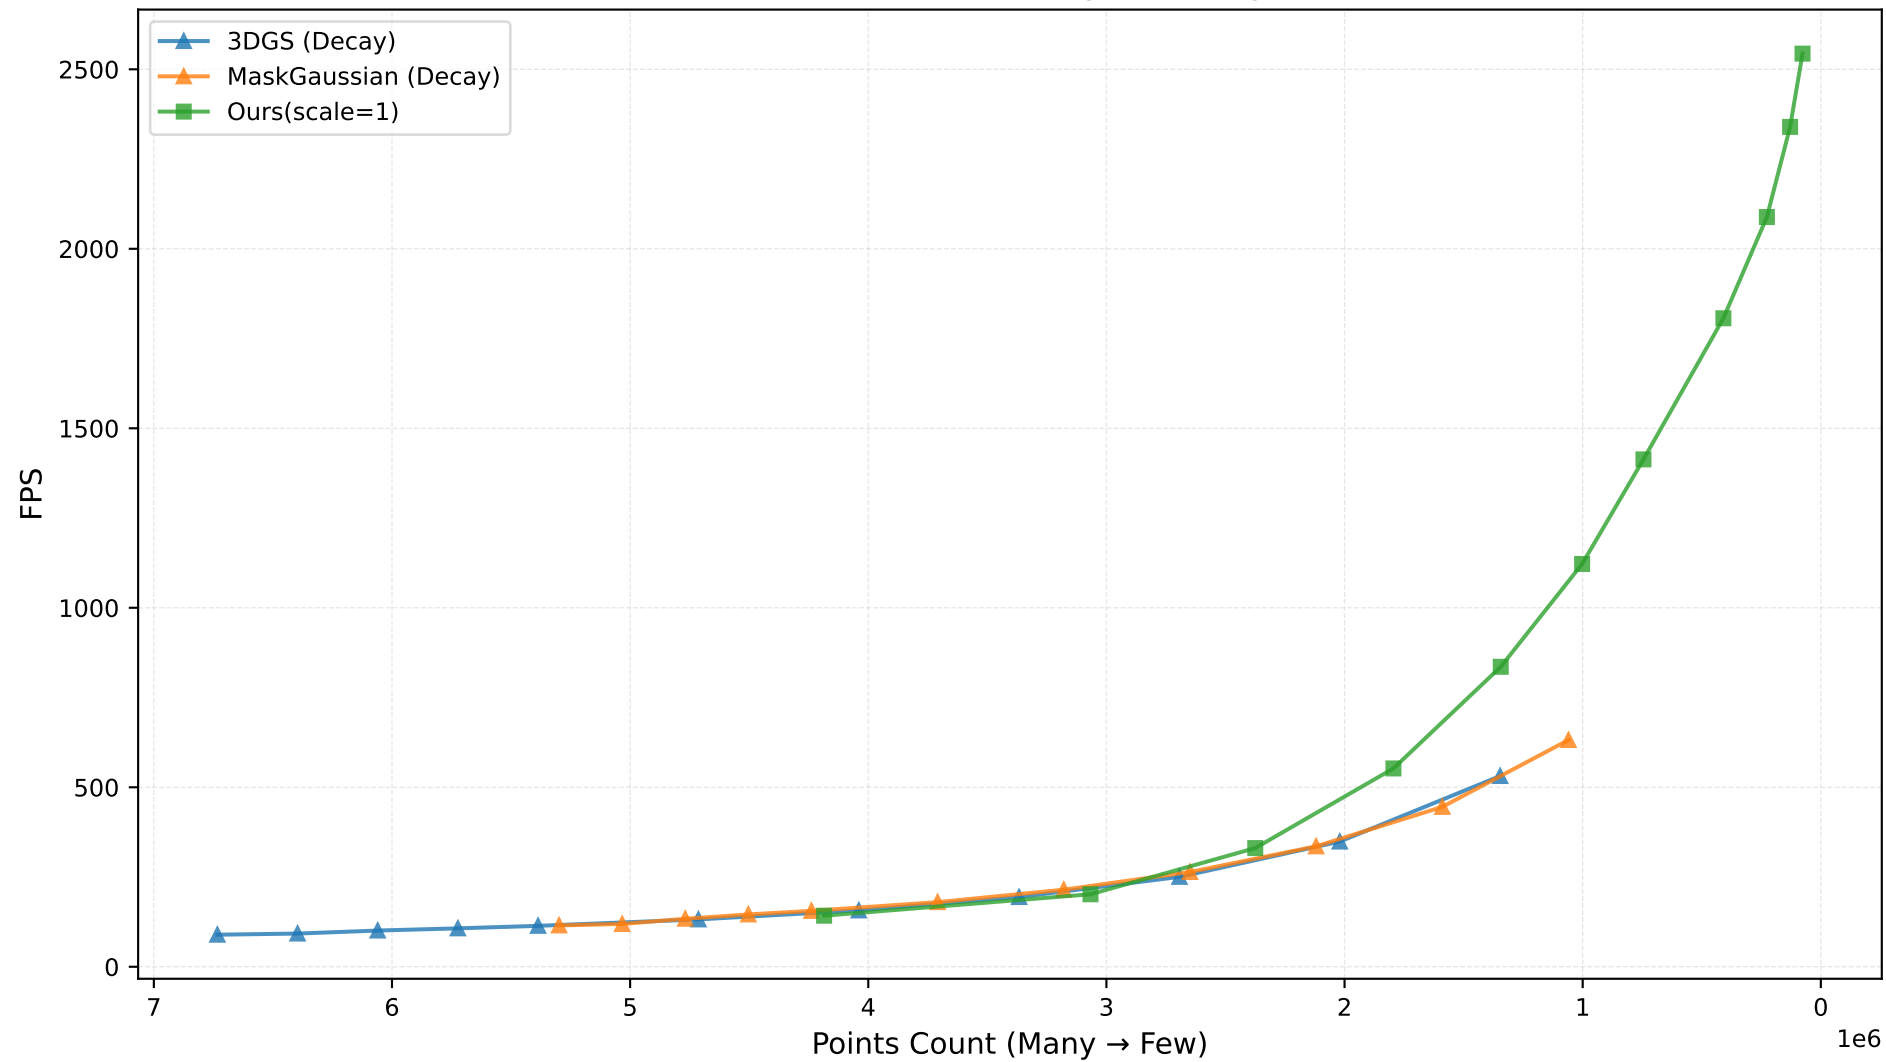

Supplement: supplementary_material [file bungeenerf_fps_rendering_averaged.pdf › visualization material/new_curves/bungeenerf_fps_rendering_averaged.pdf]

**PSNR & FPS vs Points Count - bungeenerf**

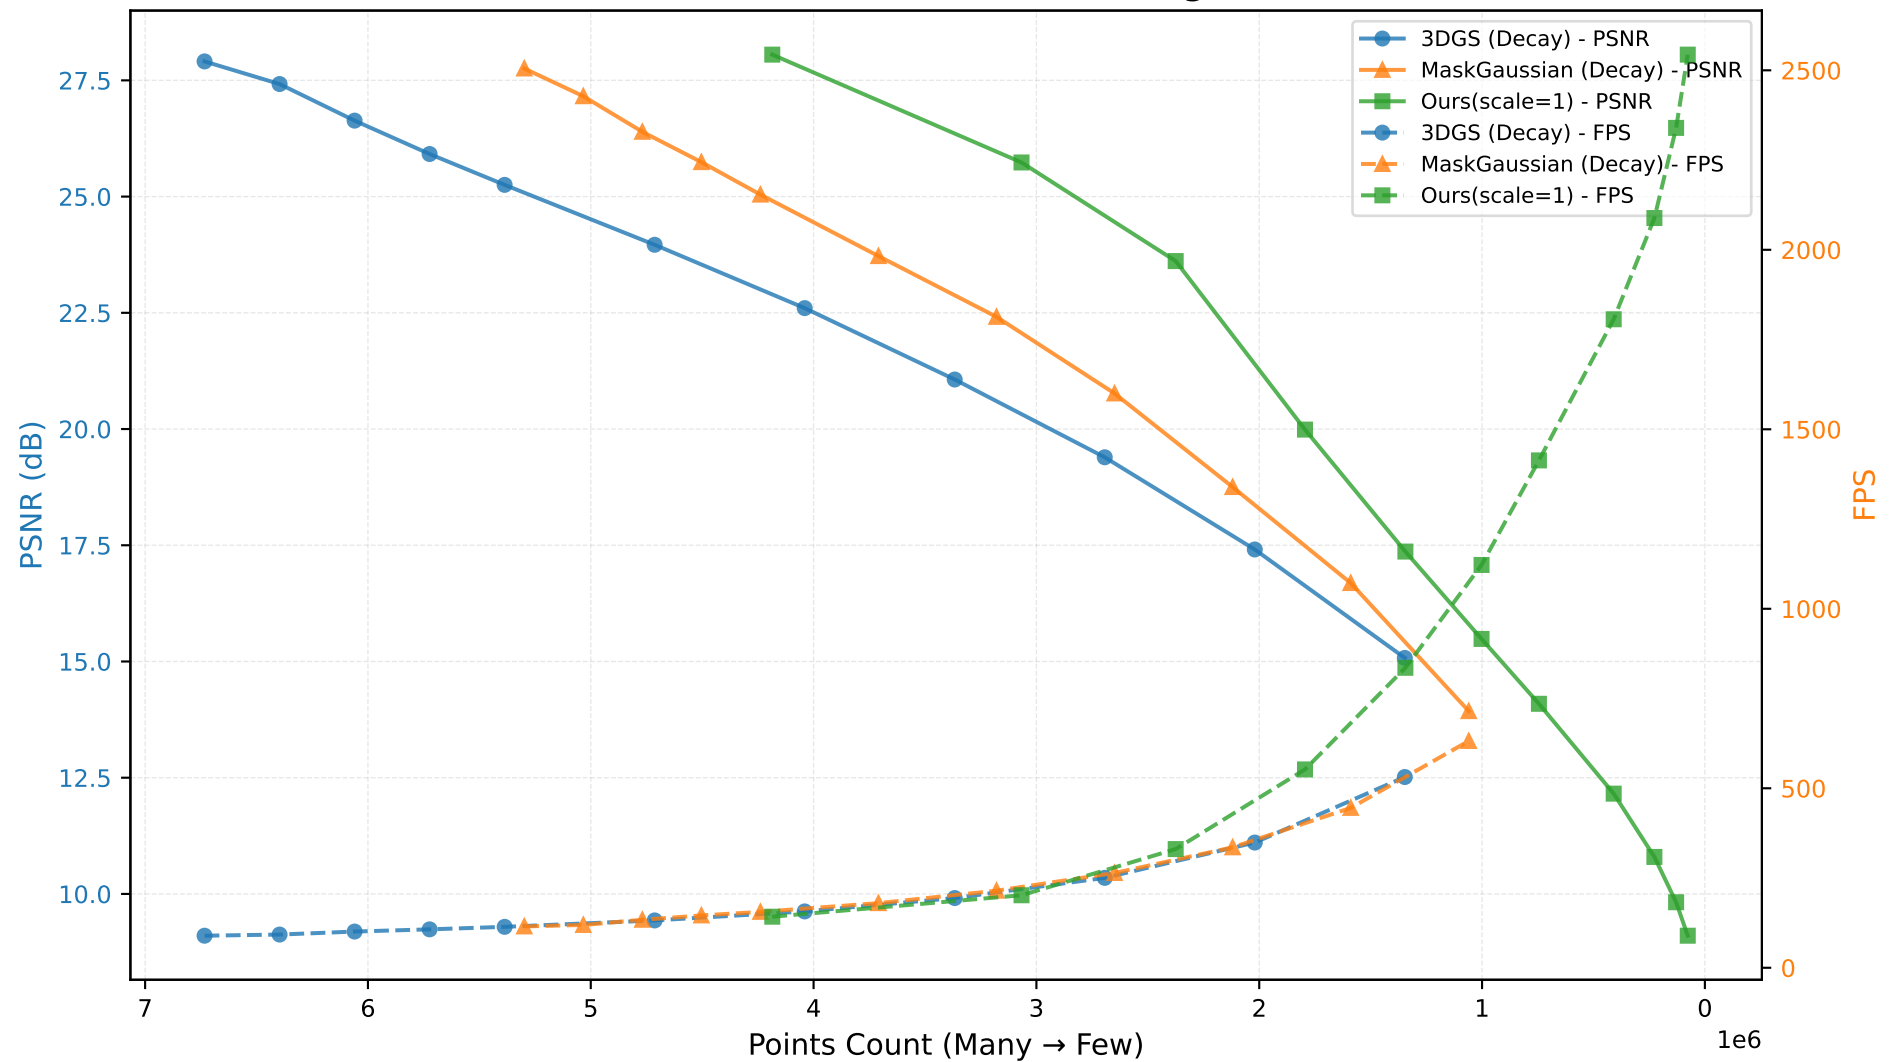

Supplement: supplementary_material [file bungeenerf_psnr_fps_dual_axis.pdf › visualization material/new_curves/bungeenerf_psnr_fps_dual_axis.pdf]

PSNR vs FPS - bungeenerf

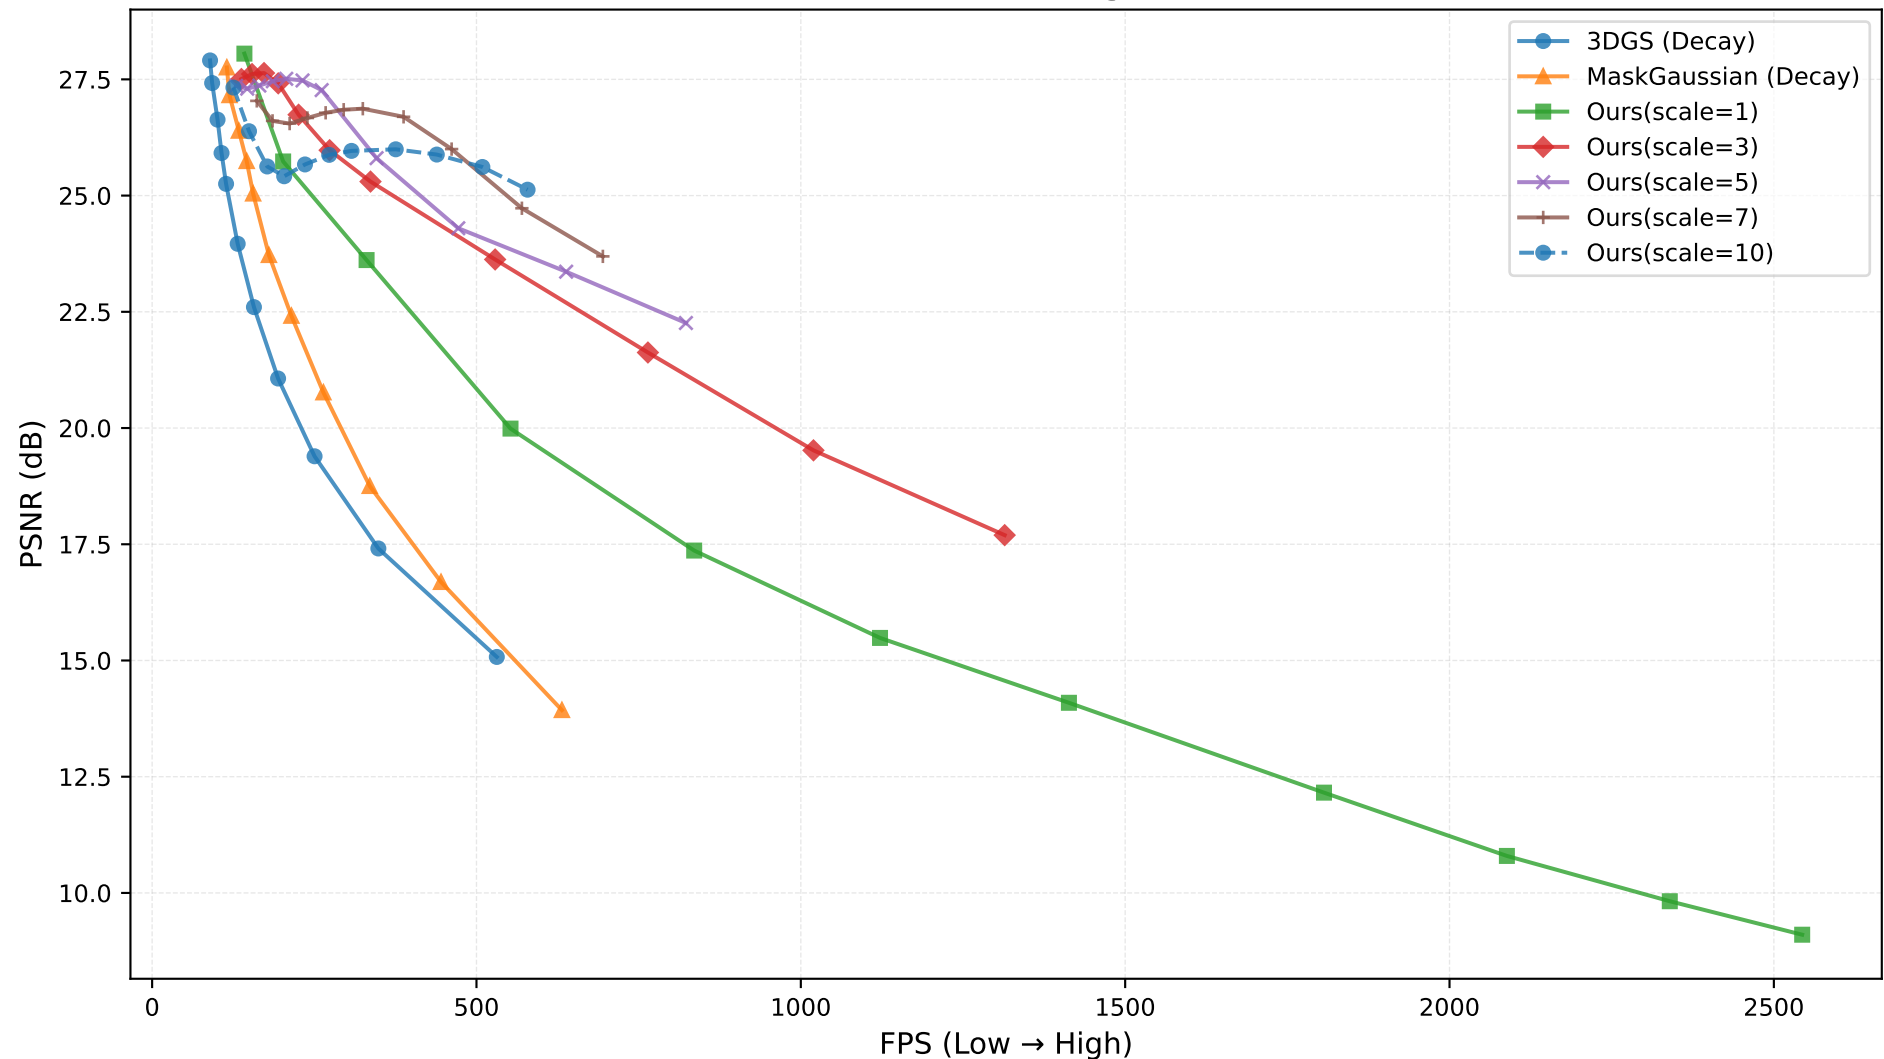

Supplement: supplementary_material [file bungeenerf_psnr_vs_fps.pdf › visualization material/new_curves/bungeenerf_psnr_vs_fps.pdf]
